# Supplementary material for: Automated segmentation of multiple sclerosis lesions using 7 Tesla MRI multi-contrast data
Source: Research Square preprint supplement (doi:10.21203/rs.3.rs-7509547/v1), 2025-10-01
Supplement: Supplementary file 1 [file 4fad09fe4ff665450ebf15b7.docx]

**SUPPLEMENTARY MATERIAL**

| Metrics | Formula |
| --- | --- |
| Dice Similarity Coefficient (DSC) / F1 score  Intersection Over Union (IoU)  Sensitivity (Recall)  Specificity  False Negative Ratio (FNR)  False Discovery Rate (FDR)  Positive Predictive Value (PPV/Precision)  Matthew’s Correlation Coefficient (MCC) |  |

**Supplementary Table S1.** Evaluation metrics.

| **Metrics** | **MP2RAGE+FLAIR** | | | | **MP2RAGE** | | | | **FLAIR** | | | |
| --- | --- | --- | --- | --- | --- | --- | --- | --- | --- | --- | --- | --- |
| **Test 1** | **Test 2** | **Test 3** | **Test 4** | **Test 1** | **Test 2** | **Test 3** | **Test 4** | **Test 1** | **Test 2** | **Test 3** | **Test 4** |
| False Negative (FN) | 15384 | 7543 | 3716 | 6460 | 17603 | 6774 | 3740 | 7004 | 18226 | 10809 | 5706 | 10133 |
| False positive (FP) | 3369 | 4531 | 940 | 8338 | 3953 | 4420 | 3062 | 11358 | 14440 | 12132 | 5878 | 14306 |
| True Positive (TP) | 28438 | 11542 | 4557 | 19842 | 26219 | 12311 | 4533 | 19298 | 25596 | 8276 | 2567 | 16169 |
| Sensitivity (Recall) | 0.65 | 0.61 | 0.55 | 0.75 | 0.60 | 0.65 | 0.55 | 0.73 | 0.58 | 0.43 | 0.31 | 0.61 |
| False Negative Rate (FNR) | 0.35 | 0.40 | 0.45 | 0.25 | 0.40 | 0.36 | 0.45 | 0.27 | 0.42 | 0.57 | 0.69 | 0.39 |
| Positive predictive value (PPV/Precision) | 0.89 | 0.72 | 0.83 | 0.70 | 0.87 | 0.74 | 0.60 | 0.63 | 0.64 | 0.41 | 0.30 | 0.53 |
| False Discovery Ratio (FDR) | 0.11 | 0.28 | 0.17 | 0.30 | 0.13 | 0.26 | 0.40 | 0.37 | 0.36 | 0.59 | 0.70 | 0.47 |
| Dice similarity coefficient (DSC) | 0.75 | 0.66 | 0.66 | 0.73 | 0.71 | 0.69 | 0.57 | 0.68 | 0.61 | 0.42 | 0.31 | 0.57 |
| Intersection Over Union (IoU) | 0.60 | 0.48 | 0.50 | 0.57 | 0.55 | 0.52 | 0.40 | 0.51 | 0.44 | 0.27 | 0.18 | 0.40 |
| Matthew’s Correlation Coefficient (MCC) | 0.76 | 0.66 | 0.68 | 0.73 | 0.72 | 0.69 | 0.57 | 0.68 | 0.61 | 0.42 | 0.31 | 0.57 |

**Supplementary** **Table S2**. Voxel-wise evaluation metrics for four test cases*.*

| **Metrics** | **MP2RAGE+FLAIR** | | **MP2RAGE** | | **FLAIR** | |
| --- | --- | --- | --- | --- | --- | --- |
| **Valid 1** | **Valid 2** | **Valid 1** | **Valid 2** | **Valid 1** | **Valid 2** |
| False Negative (FN) | 11107 | 10120 | 10582 | 14300 | 12923 | 15709 |
| False Positive (FP) | 7714 | 4382 | 9180 | 4496 | 15489 | 5394 |
| True Positive (TP) | 17768 | 29883 | 18293 | 25703 | 15952 | 24294 |
| Sensitivity (Recall) | 0.62 | 0.75 | 0.63 | 0.64 | 0.55 | 0.61 |
| False Negative Ratio (FNR) | 0.39 | 0.25 | 0.37 | 0.36 | 0.45 | 0.39 |
| Positive predictive value (PPV/Precision) | 0.70 | 0.87 | 0.67 | 0.85 | 0.51 | 0.82 |
| False Discovery Ratio (FDR) | 0.30 | 0.13 | 0.33 | 0.15 | 0.49 | 0.18 |
| Dice similarity coefficient (DSC) | 0.65 | 0.81 | 0.65 | 0.73 | 0.53 | 0.70 |
| Intersection Over Union (IoU) | 0.49 | 0.67 | 0.48 | 0.58 | 0.36 | 0.54 |
| Matthew’s Correlation Coefficient (MCC) | 0.66 | 0.81 | 0.65 | 0.74 | 0.53 | 0.70 |

**Supplementary** **Table S3**. Voxel-wise evaluation metrics for two validation cases*.*

| **Contrasts** | **Thr** | **GT** | **TP** | **FN** | **FP** | **F1 score** | **PPV** |
| --- | --- | --- | --- | --- | --- | --- | --- |
| **Test 1** | | | | | | | |
| **FLAIR+**  **MP2RAGE** | 1% | 41 | 30 | 11 | 10 | 0.74 | 0.75 |
| 30% | 30 | 11 | 0.74 | 0.75 |
| **MP2RAGE** | 1% | 30 | 11 | 17 | 0.68 | 0.64 |
| 30% | 26 | 15 | 0.62 | 0.61 |
| **FLAIR** | 1% | 27 | 14 | 68 | 0.40 | 0.28 |
| 30% | 24 | 17 | 0.36 | 0.26 |
| **Test 2** | | | | | | | |
| **FLAIR+**  **MP2RAGE** | 1% | 50 | 38 | 12 | 16 | 0.73 | 0.70 |
| 30% | 34 | 16 | 0.68 | 0.68 |
| **MP2RAGE** | 1% | 38 | 12 | 19 | 0.71 | 0.67 |
| 30% | 36 | 14 | 0.69 | 0.66 |
| **FLAIR** | 1% | 24 | 26 | 64 | 0.35 | 0.27 |
| 30% | 15 | 35 | 0.23 | 0.19 |
| **Test 3** | | | | | | | |
| **FLAIR+**  **MP2RAGE** | 1% | 42 | 30 | 12 | 7 | 0.76 | 0.81 |
| 30% | 28 | 14 | 0.73 | 0.80 |
| **MP2RAGE** | 1% | 29 | 13 | 28 | 0.59 | 0.51 |
| 30% | 28 | 14 | 0.57 | 0.50 |
| **FLAIR** | 1% | 14 | 28 | 32 | 0.32 | 0.30 |
| 30% | 12 | 30 | 0.28 | 0.27 |
| **Test 4** | | | | | | | |
| **FLAIR+**  **MP2RAGE** | 1% | 68 | 58 | 10 | 26 | 0.76 | 0.69 |
| 30% | 54 | 14 | 0.73 | 0.68 |
| **MP2RAGE** | 1% | 59 | 9 | 34 | 0.73 | 0.63 |
| 30% | 55 | 13 | 0.70 | 0.62 |
| **FLAIR** | 1% | 44 | 24 | 41 | 0.58 | 0.52 |
| 30% | 39 | 29 | 0.53 | 0.49 |

**Supplementary** **Table S4**. Lesion-wise evaluation metrics for four test cases*.*

| **Contrasts** | **Thr** | **GT** | **TP** | **FN** | **FP** | **F1 score** | **PPV** |
| --- | --- | --- | --- | --- | --- | --- | --- |
| **Valid 1** | | | | | | | |
| **FLAIR+**  **MP2RAGE** | 1% | 52 | 39 | 13 | 23 | 0.68 | 0.63 |
| 30% | 37 | 15 | 0.66 | 0.62 |
| **MP2RAGE** | 1% | 37 | 15 | 29 | 0.63 | 0.56 |
| 30% | 37 | 15 | 0.63 | 0.56 |
| **FLAIR** | 1% | 32 | 20 | 37 | 0.53 | 0.46 |
| 30% | 26 | 26 | 0.45 | 0.41 |
| **Valid 2** | | | | | | | |
| **FLAIR+**  **MP2RAGE** | 1% | 16 | 16 | 0 | 14 | 0.70 | 0.53 |
| 30% | 16 | 0 | 0.70 | 0.53 |
| **MP2RAGE** | 1% | 16 | 0 | 30 | 0.50 | 0.35 |
| 30% | 15 | 1 | 0.49 | 0.33 |
| **FLAIR** | 1% | 12 | 4 | 29 | 0.42 | 0.29 |
| 30% | 10 | 6 | 0.36 | 0.26 |

**Supplementary** **Table S5.** Lesion-wise evaluation metrics for two validation cases.

| **Metrics** | **Test 1** | | **Test 2** | | **Test 3** | | **Test 4** | |
| --- | --- | --- | --- | --- | --- | --- | --- | --- |
| **MP2RAGE** | **FLAIR** | **MP2RAGE** | **FLAIR** | **MP2RAGE** | **FLAIR** | **MP2RAGE** | **FLAIR** |
| False Negative (FN) | 23735 | 23768 | 9227 | 11604 | 5494 | 5529 | 9035 | 8575 |
| False Positive (FP) | 11074 | 5198 | 10503 | 8256 | 7999 | 4636 | 32258 | 20902 |
| True Positive (TP) | 20087 | 20054 | 9858 | 7481 | 2779 | 2744 | 17267 | 17727 |
| Sensitivity (Recall) | 0.46 | 0.46 | 0.52 | 0.39 | 0.34 | 0.33 | 0.66 | 0.67 |
| False Negative Ratio (FNR) | 0.54 | 0.54 | 0.48 | 0.61 | 0.66 | 0.69 | 0.34 | 0.33 |
| Positive predictive value (PPV/Precision) | 0.65 | 0.79 | 0.48 | 0.48 | 0.26 | 0.37 | 0.35 | 0.46 |
| False Discovery Ratio (FDR) | 0.36 | 0.21 | 0.52 | 0.53 | 0.74 | 0.63 | 0.65 | 0.54 |
| Dice similarity coefficient (DSC) | 0.54 | 0.58 | 0.50 | 0.43 | 0.29 | 0.35 | 0.46 | 0.55 |
| Intersection Over Union (IoU) | 0.37 | 0.41 | 0.33 | 0.27 | 0.17 | 0.21 | 0.30 | 0.38 |
| Matthew’s Correlation Coefficient (MCC) | 0.54 | 0.60 | 0.50 | 0.43 | 0.29 | 0.35 | 0.49 | 0.56 |

**Supplementary Table S6.** Voxel-wise evaluation for MindGlide for test dataset.

| **Contrasts** | **Thr** | **GT** | **TP** | **FN** | **FP** | **F1 score** | **PPV** |
| --- | --- | --- | --- | --- | --- | --- | --- |
| **Test 1** | | | | | | | |
| **MP2RAGE** | 1% | 41 | 16 | 25 | 30 | 0.37 | 0.35 |
| 30% | 6 | 35 | 0.16 | 0.17 |
| **FLAIR** | 1% | 18 | 23 | 31 | 0.40 | 0.37 |
| 30% | 9 | 32 | 0.22 | 0.23 |
| **Test 2** | | | | | | | |
| **MP2RAGE** | 1% | 50 | 28 | 22 | 6 | 0.67 | 0.82 |
| 30% | 24 | 26 | 0.60 | 0.80 |
| **FLAIR** | 1% | 24 | 26 | 16 | 0.53 | 0.60 |
| 30% | 16 | 34 | 0.39 | 0.50 |
| **Test 3** | | | | | | | |
| **MP2RAGE** | 1% | 42 | 18 | 24 | 17 | 0.47 | 0.51 |
| 30% | 14 | 28 | 0.38 | 0.45 |
| **FLAIR** | 1% | 19 | 23 | 29 | 0.42 | 0.40 |
| 30% | 12 | 30 | 0.29 | 0.29 |
| **Test 4** | | | | | | | |
| **MP2RAGE** | 1% | 68 | 47 | 21 | 18 | 0.71 | 0.72 |
| 30% | 42 | 26 | 0.66 | 0.70 |
| **FLAIR** | 1% | 47 | 21 | 21 | 0.69 | 0.69 |
| 30% | 41 | 27 | 0.63 | 0.66 |

**Supplementary Table S7.** Lesion-wise evaluation for MindGlide test dataset

| **Metrics** | **Test 1** | | **Test 2** | | **Test 3** | | **Test 4** | |
| --- | --- | --- | --- | --- | --- | --- | --- | --- |
| **LGA** | **LPA** | **LGA** | **LPA** | **LGA** | **LPA** | **LGA** | **LPA** |
| False Negative (FN) | 19564 | 20708 | 11599 | 8342 | 5610 | 4648 | 8738 | 6089 |
| False Positive (FP) | 9991 | 47829 | 11892 | 129843 | 2474 | 82700 | 28696 | 506591 |
| True Positive (TP) | 24258 | 23114 | 7486 | 10743 | 2663 | 3625 | 17564 | 20213 |
| Sensitivity (Recall) | 0.55 | 0.53 | 0.39 | 0.56 | 0.32 | 0.44 | 0.67 | 0.77 |
| False Negative Ratio (FNR) | 0.47 | 0.47 | 0.61 | 0.44 | 0.68 | 0.56 | 0.33 | 0.23 |
| Positive predictive value (PPV/Precision) | 0.71 | 0.33 | 0.39 | 0.08 | 0.52 | 0.04 | 0.38 | 0.04 |
| False Discovery Ratio (FDR) | 0.29 | 0.67 | 0.61 | 0.92 | 0.48 | 0.96 | 0.62 | 0.96 |
| Dice similarity coefficient (DSC) | 0.62 | 0.40 | 0.39 | 0.14 | 0.40 | 0.08 | 0.48 | 0.08 |
| Intersection Over Union (IoU) | 0.45 | 0.25 | 0.24 | 0.07 | 0.25 | 0.04 | 0.32 | 0.04 |
| Matthew’s Correlation Coefficient (MCC) | 0.63 | 0.41 | 0.39 | 0.21 | 0.41 | 0.14 | 0.50 | 0.14 |

**Supplementary** **Table S8.** Voxel-wise evaluation for SPM12 LST dataset.

| **Contrasts** | **Thr** | **GT** | **TP** | **FN** | **FP** | **F1 score** | **PPV** |
| --- | --- | --- | --- | --- | --- | --- | --- |
| **Test 1** | | | | | | | |
| **LGA** | 1% | 41 | 25 | 16 | 95 | 0.31 | 0.21 |
| 30% | 14 | 27 | 0.19 | 0.13 |
| **LPA** | 1% | 24 | 17 | 1005 | 0.05 | 0.02 |
| 30% | 18 | 23 | 0.03 | 0.02 |
| **Test 2** | | | | | | | |
| **LGA** | 1% | 50 | 25 | 25 | 84 | 0.31 | 0.23 |
| 30% | 13 | 37 | 0.18 | 0.13 |
| **LPA** | 1% | 25 | 25 | 1159 | 0.04 | 0.02 |
| 30% | 18 | 32 | 0.03 | 0.02 |
| **Test 3** | | | | | | | |
| **LGA** | 1% | 42 | 15 | 27 | 27 | 0.36 | 0.36 |
| 30% | 10 | 32 | 0.25 | 0.27 |
| **LPA** | 1% | 20 | 22 | 946 | 0.04 | 0.02 |
| 30% | 18 | 24 | 0.04 | 0.02 |
| **Test 4** | | | | | | | |
| **LGA** | 1% | 68 | 40 | 28 | 48 | 0.51 | 0,46 |
| 30% | 35 | 33 | 0.46 | 0.42 |
| **LPA** | 1% | 47 | 21 | 1092 | 0.09 | 0.04 |
| 30% | 46 | 22 | 0.08 | 0.04 |

**Supplementary Table S9.** Lesion-wise evaluation for SPM12 LST test dataset.


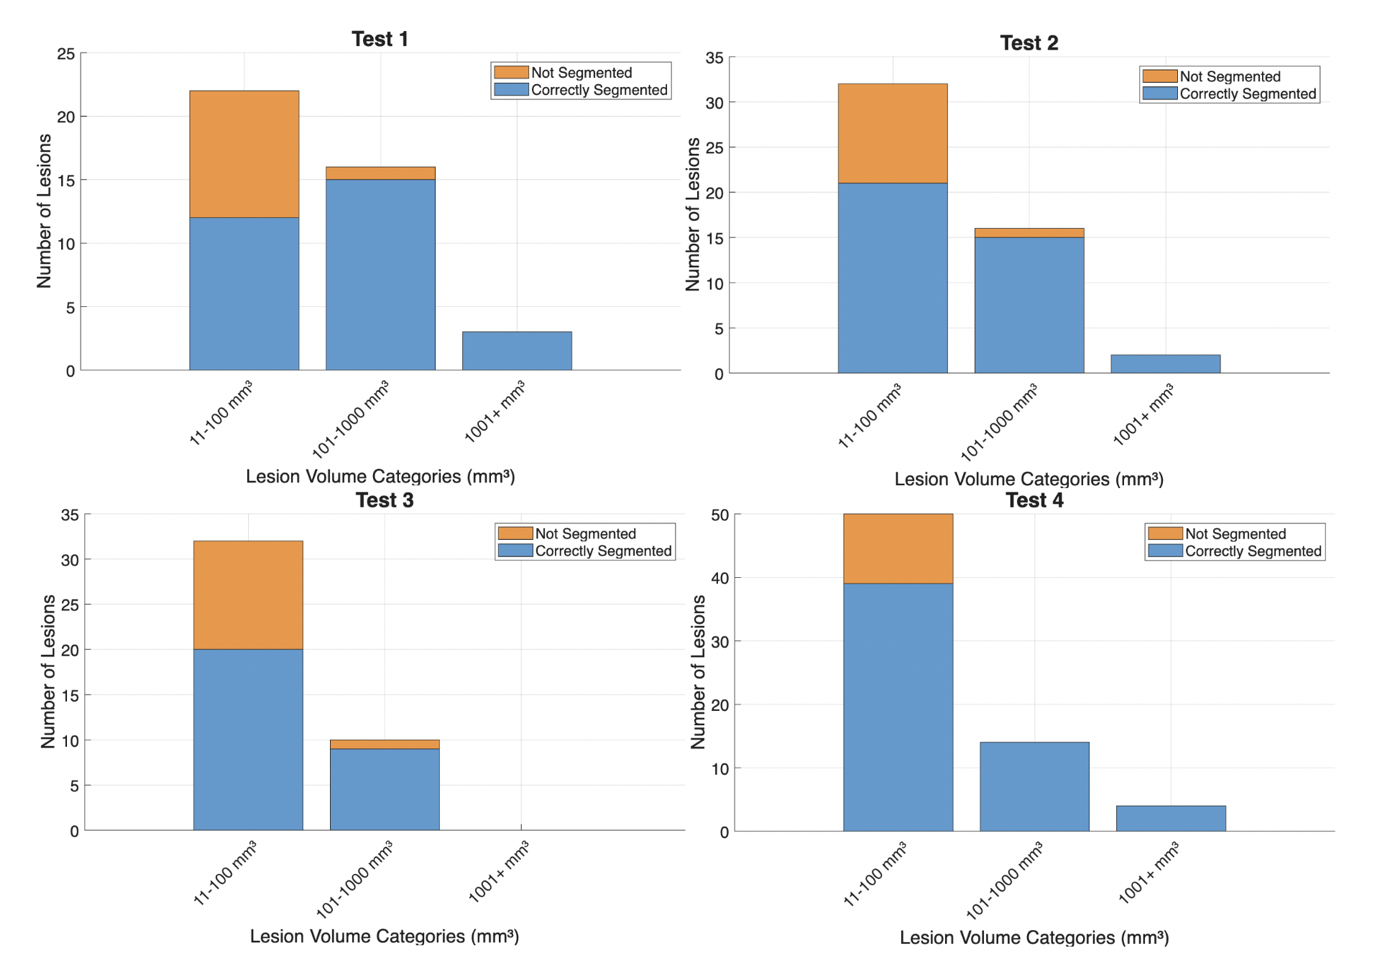


**Supplementary** **Figure S1**. Correctly (blue) and not segmented (orange) lesions by volume category for one contrast (MP2RAGE) for four test cases.

**
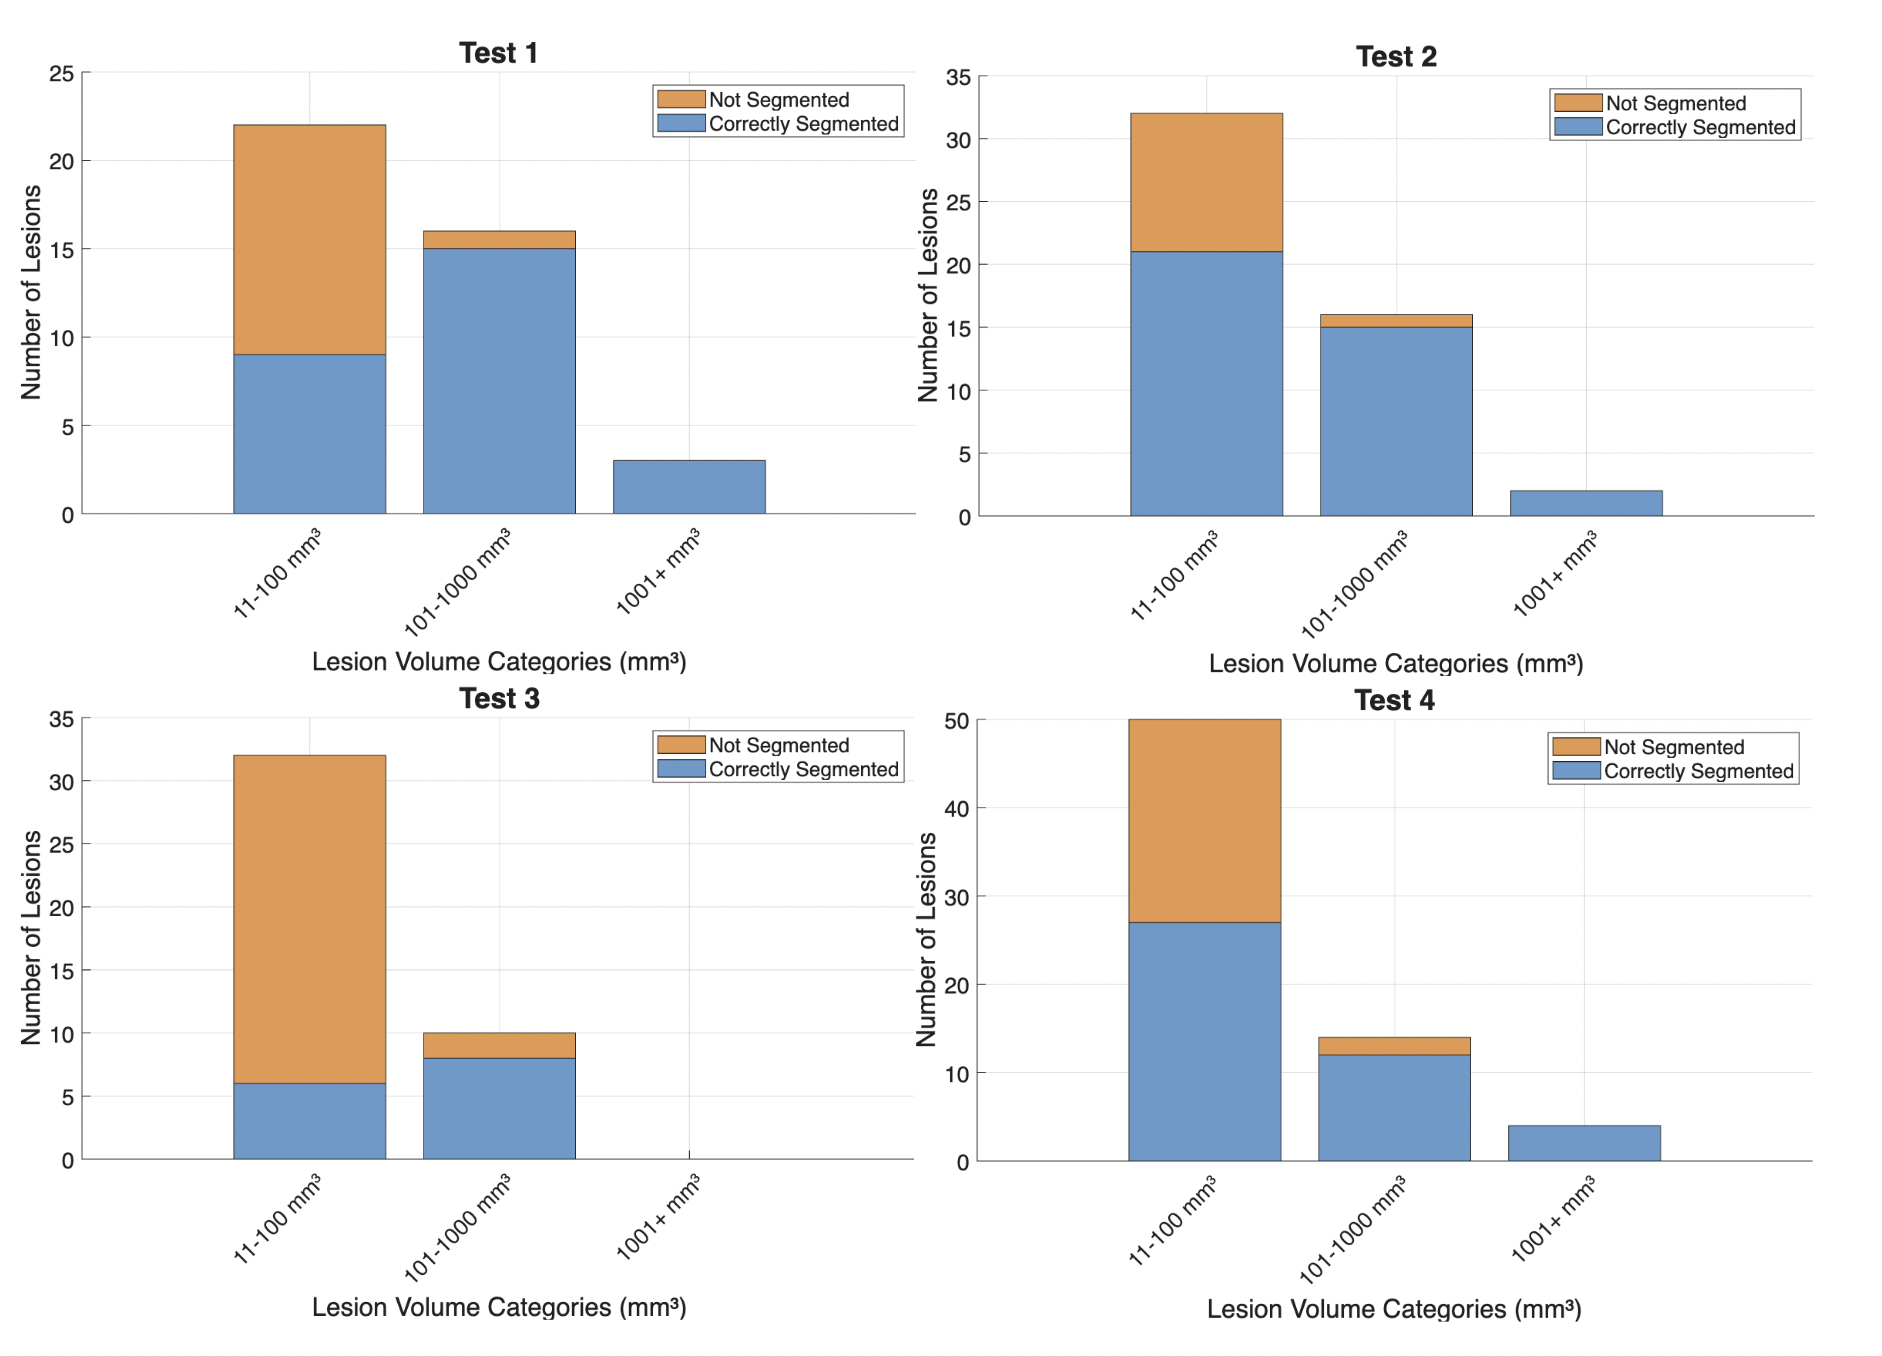
**

**Supplementary** **Figure S2.** Correctly (blue) and not segmented (orange) lesions by volume category for one contrast (FLAIR) for four test cases.


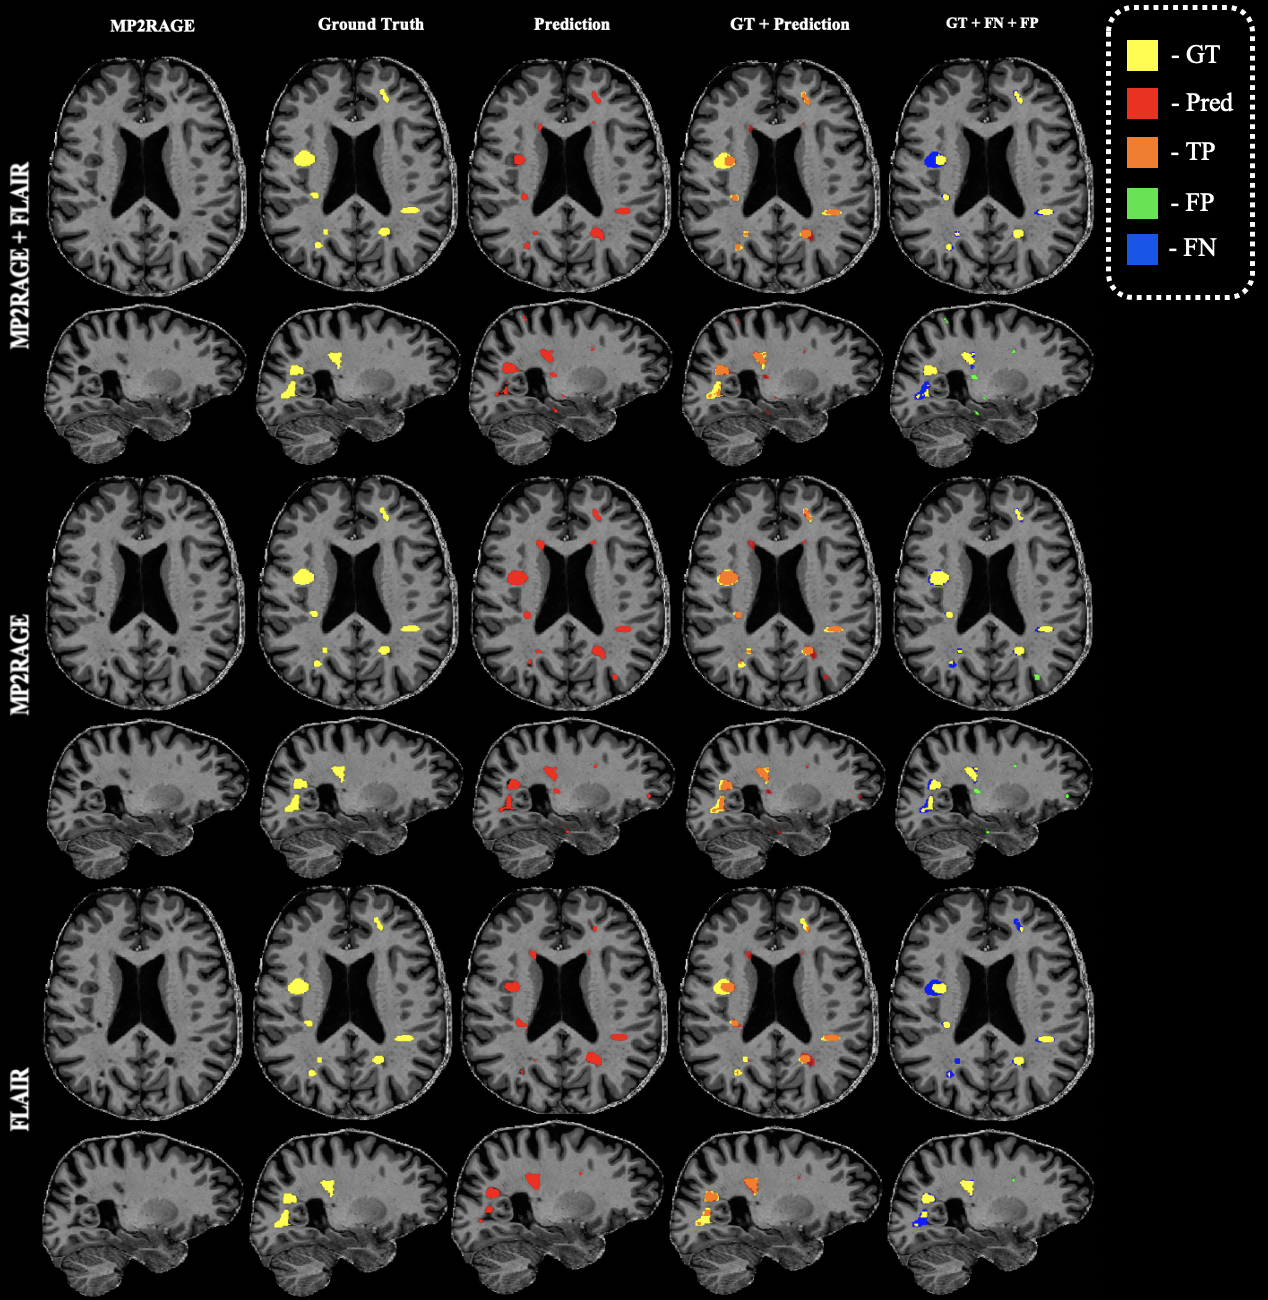
 **Supplementary** **Figure S3.** Comparison of lesion segmentation results from models trained using different combinations of MP2RAGE and FLAIR contrasts, showed on axial and sagittal slices of the first validation case. (Ground truth (GT) lesions are shown in yellow, model predictions in red, overlap of GT and Prediction in orange, false negatives (FN) in blue, and false positives (FP) in green.)


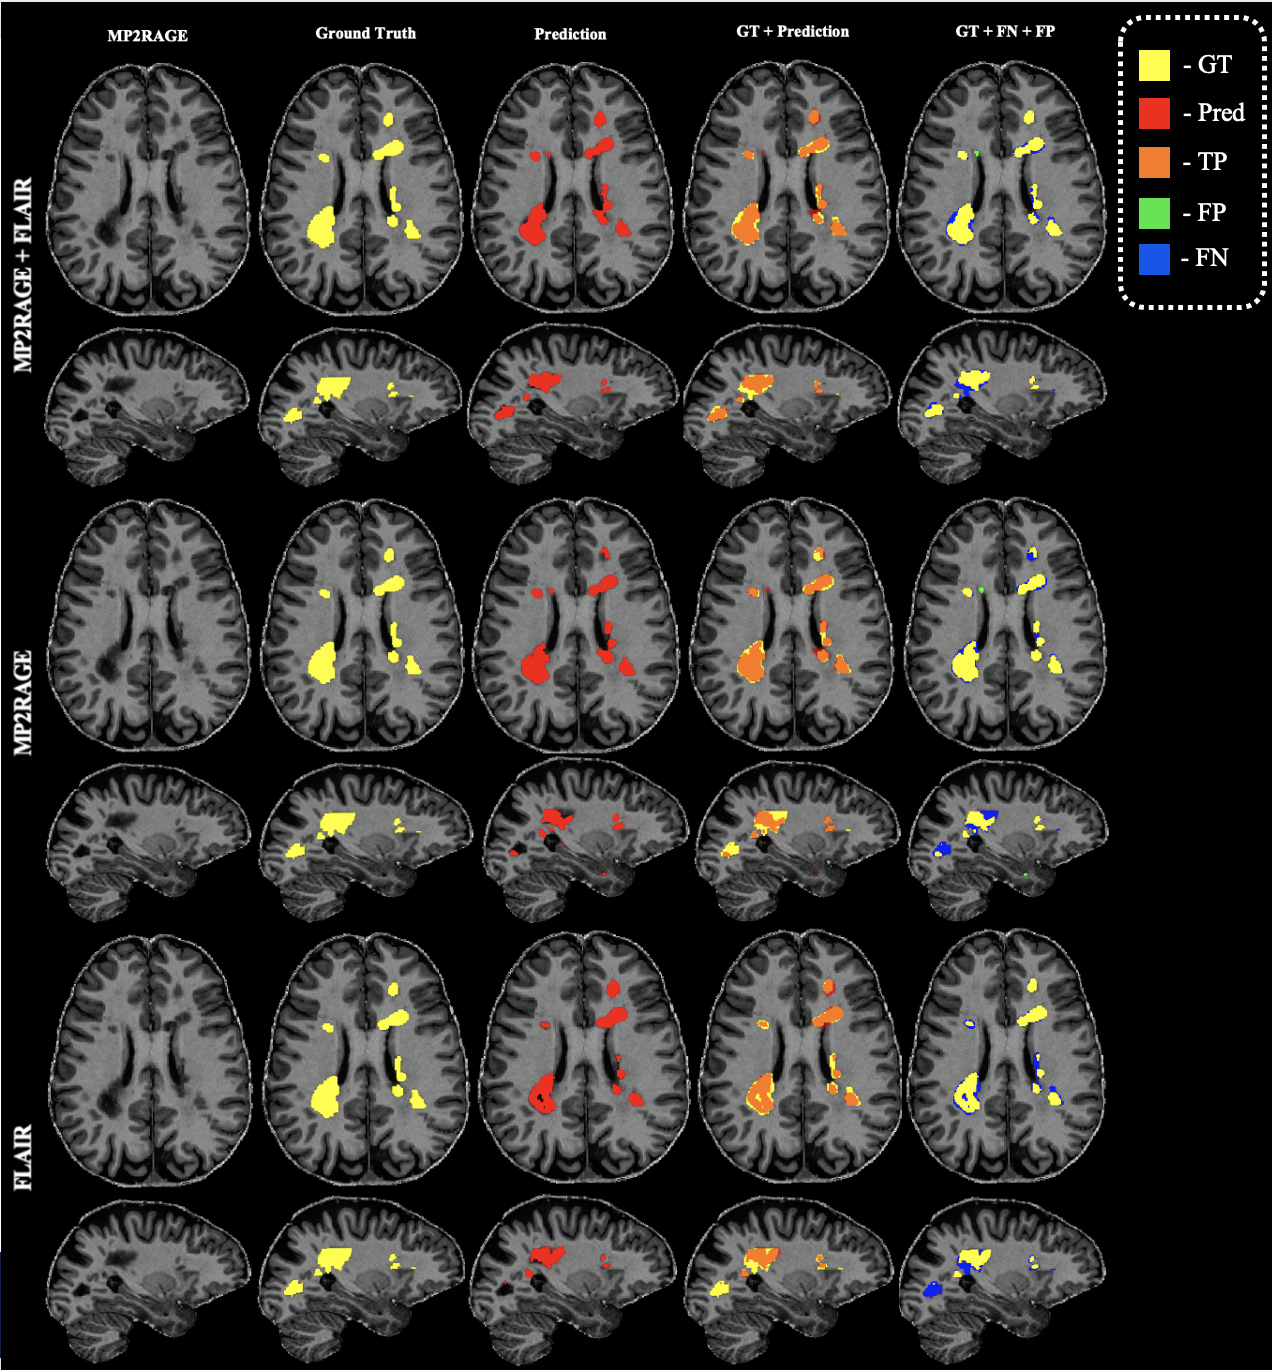


**Supplementary** **Figure S4.** Comparison of lesion segmentation results from models trained using different combinations of MP2RAGE and FLAIR contrasts, showed on axial and sagittal slices of the second validation case. (Ground truth (GT) lesions are shown in yellow, model predictions in red, overlap of GT and Prediction in orange, false negatives (FN) in blue, and false positives (FP) in green.)


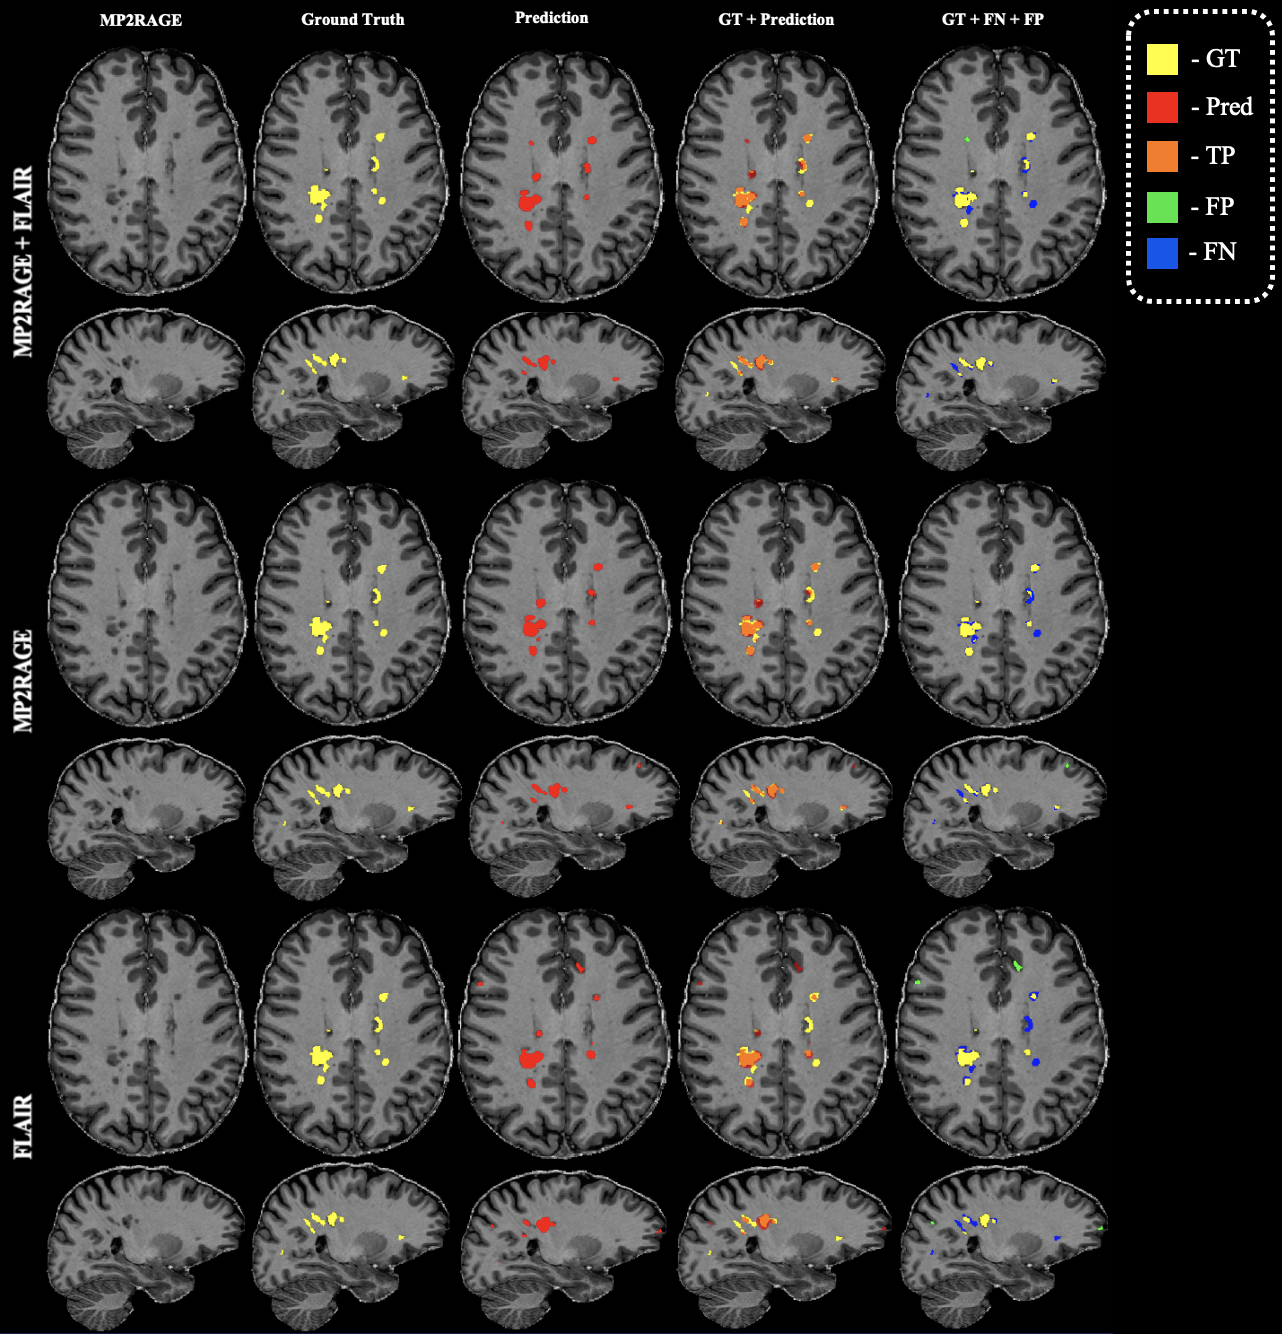


**Supplementary** **Figure S5.** Comparison of lesion segmentation results from models trained using different combinations of MP2RAGE and FLAIR contrasts, showed on axial and sagittal slices of the second test case. (Ground truth (GT) lesions are shown in yellow, model predictions in red, overlap of GT and Prediction in orange, false negatives (FN) in blue, and false positives (FP) in green.)


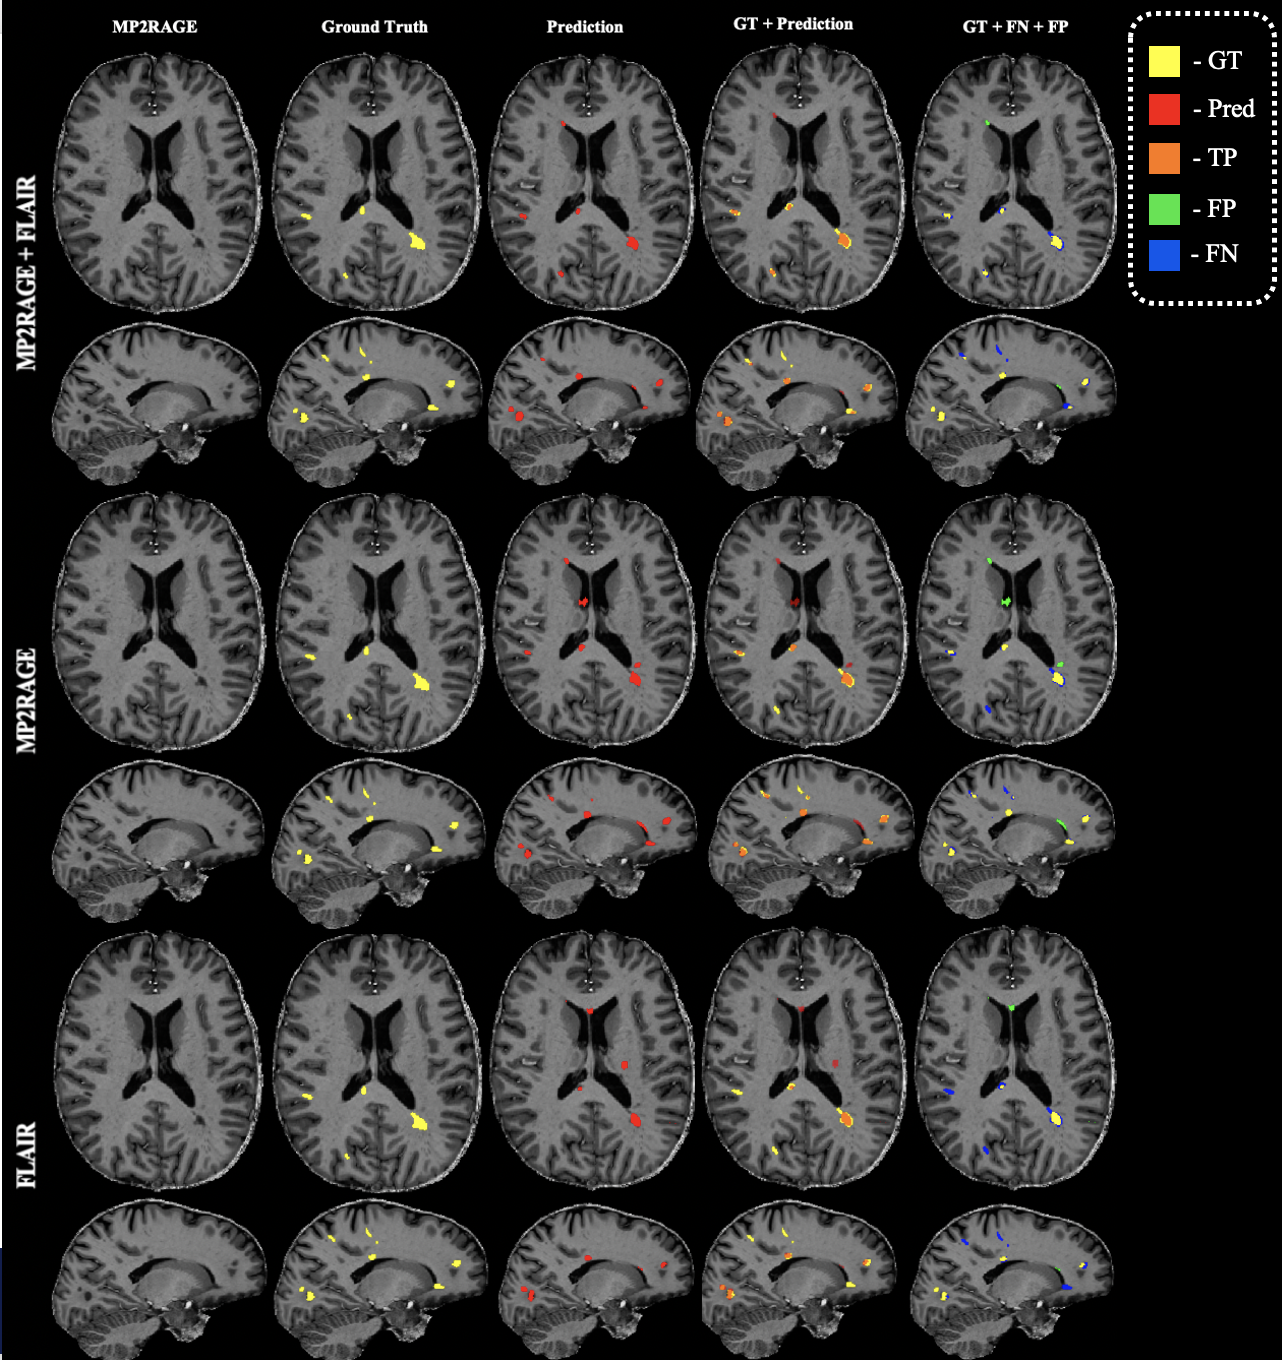


**Supplementary** **Figure S6**. Comparison of lesion segmentation results from models trained using different combinations of MP2RAGE and FLAIR contrasts, showed on axial and sagittal slices of the third test case. (Ground truth (GT) lesions are shown in yellow, model predictions in red, overlap of GT and Prediction in orange, false negatives (FN) in blue, and false positives (FP) in green.)

**
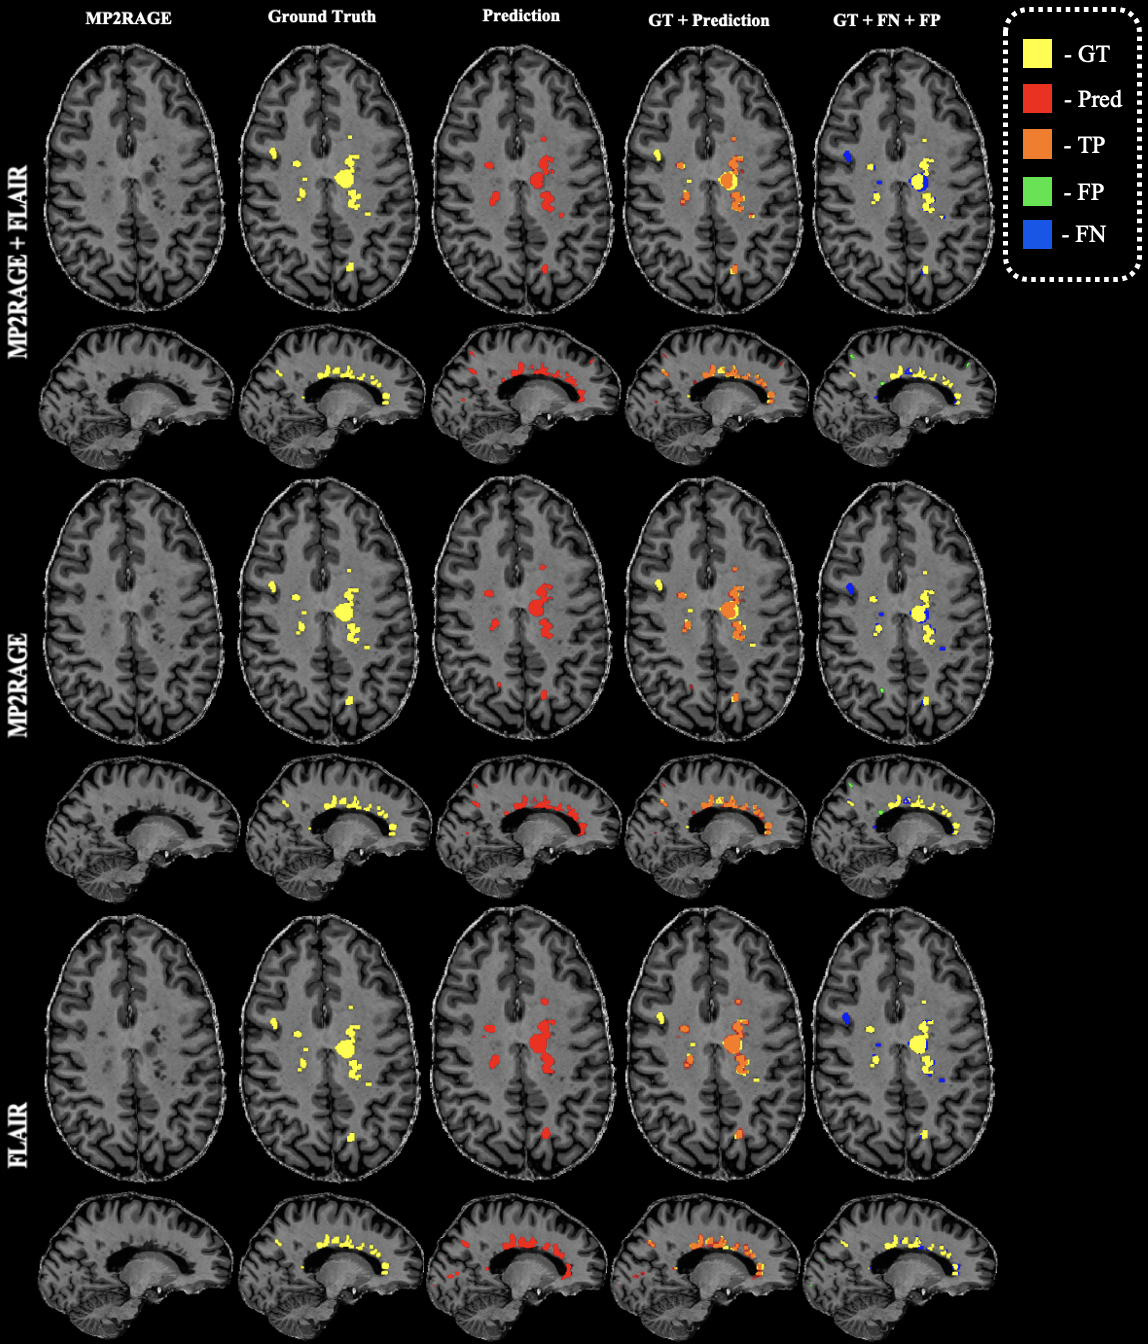
**

**Supplementary** **Figure S7.** Comparison of lesion segmentation results from models trained using different combinations of MP2RAGE and FLAIR contrasts, showed on axial and sagittal slices of the fourth test case. (Ground truth (GT) lesions are shown in yellow, model predictions in red, overlap of GT and Prediction in orange, false negatives (FN) in blue, and false positives (FP) in green

| **Method** | **Type of NN** | **Dataset** | **Number of cases** | **Dice score(avr)** | **DOI** |
| --- | --- | --- | --- | --- | --- |
| Proposed  (FLAIR+MP2RAGE) | 3D CNN | in-house | 48 | 0.70 |  |
| Hashemi et.al (2018) | 3D FCNN | MICCAI2016  ISBI 2015 | 72 | 69.9  65.7 | 10.1109/ACCESS.2018.2886371 |
| Valverde et.al. (2019) | 3D CNN | MICCAI 2008  MICCAI 2016  ISBI 2015  Clinical | 120 | 63 | 10.1016/j.nicl.2018.101638 |
| McKinley et.al (2021) | 3D CNN | MICCAI 2016  Insel 92  Insel 32 | 129 | 60 | 10.1038/s41598-020-79925-4 |
| Zhang et.al (2022) | 2D CNN | Multi-centre dataset | 135 | 80 | 10.1007/s00234-021-02820-w |
| Hou et.al (2020) | 3D U-Net | ISBI 2015 | 19 | 64.3 | 10.1109/BIBM47256.2019.8983149 |
| Brosch et.al. (2016) | 3D CNN | MICCAI 2008  ISBI 2015  Clinical | 250 | 64 | 10.1109/TMI.2016.2528821 |
| Coronado et.al. (2021) | 3D CNN | CombiRx | 1006 | 77 | 10.1177/1352458520921364 |
| Raab et.al. (2023) | 2D CNN | ISBI 2015  MICCAI 2016 | 34 | 78 | 10.1038/s41598-023-48578-4 |
| Aslani et.al. (2020) | 2D CNN | Clinical  ISBI 2015 | 117 | 50 | 10.1109/ISBI45749.2020.9098721 |
| Amaludin et.al. (2023) | 3D U-Net | ISBI 2015  OpenMS | 49 | 86 | 10.1002/ima.22941 |

**Supplementary** **Table S10.** Comparison proposed methods with other published NN.
